# Supplementary material for: Assessing Accessibility of Footpath-Level Walkability in Old Core Cities of India for Promoting Universal Mobility through Architectural Planning Research: <i>Case Study of Central Kolkata, India</i>
Source: Preprints.org preprint supplement (doi:10.20944/preprints202112.0412.v1), 2021-12-24
Supplement: Supplementary file 1 [file supplementary]

**ADDITIONAL DOCUMENT**

Variable: **Building Typology of Stretch**

| S.No | | 1 | | | |
| --- | --- | --- | --- | --- | --- |
| Criterion | | Building Typology of Stretch | | | |
| Sub Criterion | | Absence of Buildings that are having 'two or more' building uses within a single building | Associated Score | Absence of Heritage/ historic buildings | Associated Score |
| Variable Type | | ***Independent*** | | | |
| Marking logic | | Beneficial if Absent | | | |
| 1 | Nirmal Chandra Dey Street | No | -0.50 | No | -0.50 |
| 2 | Bowbazar Crossing to New Bowbazar Lane | No | -0.50 | No | -0.50 |
| 3 | New Bowbazar lane | No | -0.50 | No | -0.50 |
| 4 | New Bowbazar Lane to Kenderdine Lane | No | -0.50 | No | -0.50 |
| 5 | Kenderdine Lane | No | -0.50 | No | -0.50 |
| 6 | Kenderdine Lane to Central Avenue | No | -0.50 | No | -0.50 |
| 7 | Central Avenue (GATE 4_Yogayog Bhawan) | No | -0.50 | Yes | 0.50 |
| 8 | Central Metro(GATE 1_Indian Airlines) | No | -0.50 | Yes | 0.50 |
| 9 | Central Avenue to Bow Street | No | -0.50 | No | -0.50 |
| 10 | Bow Street | No | -0.50 | No | -0.50 |
| 11 | Bow Street to Metcalfe Street | No | -0.50 | No | -0.50 |
| 12 | Metcalfe Street | No | -0.50 | No | -0.50 |
| 13 | Metcalfe Street to Bentinck Street | No | -0.50 | No | -0.50 |
| 14 | Bentinck Street | No | -0.50 | Yes | 0.50 |
| 15 | Rabindra Sarani Rd. | No | -0.50 | No | -0.50 |
| 16 | Rabindra Sarani Rd. to Chatawalla Gully | No | -0.50 | No | -0.50 |
| 17 | Chatawalla Gully | No | -0.50 | No | -0.50 |
| 18 | Chatawalla Gully to Phears Bye Lane | No | -0.50 | No | -0.50 |
| 19 | Phears Bye Lane | No | -0.50 | No | -0.50 |
| 20 | Phears Bye Lane to Phears Lane | No | -0.50 | No | -0.50 |
| 21 | Phears Lane | No | -0.50 | No | -0.50 |
| 22 | Phears Lane to Giri Babu lane | No | -0.50 | No | -0.50 |
| 23 | Giri Babu lane | No | -0.50 | No | -0.50 |
| 24 | Giri Babu lane to Central Avenue | No | -0.50 | No | -0.50 |
| 25 | Central Metro (GATE 2_Lalbazar) | No | -0.50 | Yes | 0.50 |
| 26 | Central Avenue (GATE 3_RITES) | No | -0.50 | Yes | 0.50 |
| 27 | Central Avenue to Gangadhar Babu Lane | No | -0.50 | No | -0.50 |
| 28 | Gangadhar Babu lane | No | -0.50 | No | -0.50 |
| 29 | Gangadhar Babu Lane to Bibi Rozio Lane | No | -0.50 | No | -0.50 |
| 30 | Bibi Rozio Lane | No | -0.50 | No | -0.50 |
| 31 | Bibi Rozio Lane to Bowbazar Crossing | No | -0.50 | No | -0.50 |
| 32 | College Street | No | -0.50 | No | -0.50 |

[Scoring Pattern: If Yes: +0.50 for Independent Variable and +0.25 for dependent Variable; If No: -0.50 for Independent Variable; -0.25 for dependent Variable]

Variable: **Footpath Dimension**

| S.No | | 2 | | | | | | | |
| --- | --- | --- | --- | --- | --- | --- | --- | --- | --- |
| Criterion | | Footpath Dimension | | | | | | | |
| Sub Criterion | | Footpath Width >2500mm | Associated Score | | Unobstructed width of 1800mm | | **Associated Score** | Unobstructed clear height of 2200mm | **Associated Score** |
| Variable Type | | ***Independent*** | | | | | | | |
| Marking logic | | Beneficial if Present | | | | | | | |
| 1 | Nirmal Chandra Dey Street | No | | -0.50 | | No | -0.50 | No | -0.50 |
| 2 | Bowbazar Crossing to New Bowbazar Lane | No | | -0.50 | | No | -0.50 | Yes | 0.50 |
| 3 | New Bowbazar lane | Yes | | 0.50 | | Yes | 0.50 | Yes | 0.50 |
| 4 | New Bowbazar Lane to Kenderdine Lane | No | | -0.50 | | No | -0.50 | Yes | 0.50 |
| 5 | Kenderdine Lane | Yes | | 0.50 | | Yes | 0.50 | Yes | 0.50 |
| 6 | Kenderdine Lane to Central Avenue | No | | -0.50 | | No | -0.50 | No | -0.50 |
| 7 | Central Avenue (GATE 4_Yogayog Bhawan) | No | | -0.50 | | No | -0.50 | No | -0.50 |
| 8 | Central Metro(GATE 1_Indian Airlines) | No | | -0.50 | | No | -0.50 | Yes | 0.50 |
| 9 | Central Avenue to Bow Street | No | | -0.50 | | No | -0.50 | No | -0.50 |
| 10 | Bow Street | Yes | | 0.50 | | Yes | 0.50 | Yes | 0.50 |
| 11 | Bow Street to Metcalfe Street | No | | -0.50 | | Yes | 0.50 | Yes | 0.50 |
| 12 | Metcalfe Street | Yes | | 0.50 | | Yes | 0.50 | Yes | 0.50 |
| 13 | Metcalfe Street to Bentinck Street | No | | -0.50 | | Yes | 0.50 | Yes | 0.50 |
| 14 | Bentinck Street | No | | -0.50 | | No | -0.50 | No | -0.50 |
| 15 | Rabindra Sarani Rd. | No | | -0.50 | | No | -0.50 | Yes | 0.50 |
| 16 | Rabindra Sarani Rd. to Chatawalla Gully | No | | -0.50 | | No | -0.50 | Yes | 0.50 |
| 17 | Chatawalla Gully | Yes | | 0.50 | | Yes | 0.50 | Yes | 0.50 |
| 18 | Chatawalla Gully to Phears Bye Lane | No | | -0.50 | | No | -0.50 | Yes | 0.50 |
| 19 | Phears Bye Lane | No | | -0.50 | | Yes | 0.50 | Yes | 0.50 |
| 20 | Phears Bye Lane to Phears Lane | No | | -0.50 | | No | -0.50 | Yes | 0.50 |
| 21 | Phears Lane | Yes | | 0.50 | | Yes | 0.50 | Yes | 0.50 |
| 22 | Phears Lane to Giri Babu lane | No | | -0.50 | | No | -0.50 | Yes | 0.50 |
| 23 | Giri Babu lane | No | | -0.50 | | Yes | 0.50 | Yes | 0.50 |
| 24 | Giri Babu lane to Central Avenue | No | | -0.50 | | No | -0.50 | Yes | 0.50 |
| 25 | Central Metro (GATE 2_Lalbazar) | No | | -0.50 | | No | -0.50 | No | -0.50 |
| 26 | Central Avenue (GATE 3_RITES) | No | | -0.50 | | No | -0.50 | Yes | 0.50 |
| 27 | Central Avenue to Gangadhar Babu Lane | No | | -0.50 | | No | -0.50 | No | -0.50 |
| 28 | Gangadhar Babu lane | Yes | | 0.50 | | Yes | 0.50 | Yes | 0.50 |
| 29 | Gangadhar Babu Lane to Bibi Rozio Lane | No | | -0.50 | | No | -0.50 | No | -0.50 |
| 30 | Bibi Rozio Lane | No | | -0.50 | | No | -0.50 | Yes | 0.50 |
| 31 | Bibi Rozio Lane to Bowbazar Crossing | No | | -0.50 | | No | -0.50 | Yes | 0.50 |
| 32 | College Street | No | | -0.50 | | No | -0.50 | No | -0.50 |

[Scoring Pattern: If Yes: +0.50 for Independent Variable and +0.25 for dependent Variable; If No: -0.50 for Independent Variable; -0.25 for dependent Variable]

Variable: **Temporary Encroachment**

| S.No | | 3 | | | | | |
| --- | --- | --- | --- | --- | --- | --- | --- |
| Criterion | | Temporary Encroachment | | | | | |
| Sub Criterion | | Absence of Unorganized Informal Vendors functional during day/ night | **Associated Score** | Absence of Unorganized Informal Vendors/ hawkers away from the line of pedestrian flow **(if Vendors are present)** | **Associated Score** | Absence of Beggar/ homeless/ child labour occupying a part of the footpath as their homes | **Associated Score** |
| Variable Type | | ***Independent*** | | ***Dependent*** | | ***Independent*** | |
| Marking logic | | Beneficial if Absent | | Beneficial if Present | | Beneficial if Absent | |
| 1 | **Nirmal Chandra Dey Street** | No | -0.50 | No | -0.25 | No | -0.50 |
| 2 | **Bowbazar Crossing to New Bowbazar Lane** | Yes | 0.50 | N/A | -0.25 | No | -0.50 |
| 3 | **New Bowbazar lane** | Yes | 0.50 | N/A | -0.25 | No | -0.50 |
| 4 | **New Bowbazar Lane to Kenderdine Lane** | No | -0.50 | No | -0.25 | Yes | 0.50 |
| 5 | **Kenderdine Lane** | Yes | 0.50 | N/A | -0.25 | Yes | 0.50 |
| 6 | **Kenderdine Lane to Central Avenue** | No | -0.50 | No | -0.25 | No | -0.50 |
| 7 | **Central Avenue (GATE 4_Yogayog Bhawan)** | Yes | 0.50 | N/A | -0.25 | No | -0.50 |
| 8 | **Central Metro(GATE 1_Indian Airlines)** | No | -0.50 | Yes | 0.25 | No | -0.50 |
| 9 | **Central Avenue to Bow Street** | No | -0.50 | Yes | 0.25 | No | -0.50 |
| 10 | **Bow Street** | Yes | 0.50 | N/A | -0.25 | No | -0.50 |
| 11 | **Bow Street to Metcalfe Street** | Yes | 0.50 | N/A | -0.25 | No | -0.50 |
| 12 | **Metcalfe Street** | Yes | 0.50 | N/A | -0.25 | No | -0.50 |
| 13 | **Metcalfe Street to Bentinck Street** | No | -0.50 | No | -0.25 | No | -0.50 |
| 14 | **Bentinck Street** | Yes | 0.50 | N/A | -0.25 | No | -0.50 |
| 15 | **Rabindra Sarani Rd.** | Yes | 0.50 | N/A | -0.25 | No | -0.50 |
| 16 | **Rabindra Sarani Rd. to Chatawalla Gully** | No | -0.50 | Yes | 0.25 | No | -0.50 |
| 17 | **Chatawalla Gully** | Yes | 0.50 | N/A | -0.25 | Yes | 0.50 |
| 18 | **Chatawalla Gully to Phears Bye Lane** | Yes | 0.50 | N/A | -0.25 | No | -0.50 |
| 19 | **Phears Bye Lane** | Yes | 0.50 | N/A | -0.25 | No | -0.50 |
| 20 | **Phears Bye Lane to Phears Lane** | Yes | 0.50 | N/A | -0.25 | No | -0.50 |
| 21 | **Phears Lane** | No | -0.50 | No | -0.25 | No | -0.50 |
| 22 | **Phears Lane to Giri Babu lane** | No | -0.50 | Yes | 0.25 | No | -0.50 |
| 23 | **Giri Babu lane** | Yes | 0.50 | N/A | -0.25 | Yes | 0.50 |
| 24 | **Giri Babu lane to Central Avenue** | No | -0.50 | No | -0.25 | No | -0.50 |
| 25 | **Central Metro (GATE 2_Lalbazar)** | No | -0.50 | No | -0.25 | Yes | 0.50 |
| 26 | **Central Avenue (GATE 3_RITES)** | Yes | 0.50 | N/A | -0.25 | Yes | 0.50 |
| 27 | **Central Avenue to Gangadhar Babu Lane** | No | -0.50 | Yes | 0.25 | No | -0.50 |
| 28 | **Gangadhar Babu lane** | No | -0.50 | Yes | 0.25 | No | -0.50 |
| 29 | **Gangadhar Babu Lane to Bibi Rozio Lane** | No | -0.50 | No | -0.25 | No | -0.50 |
| 30 | **Bibi Rozio Lane** | Yes | 0.50 | N/A | -0.25 | Yes | 0.50 |
| 31 | **Bibi Rozio Lane to Bowbazar Crossing** | Yes | 0.50 | N/A | -0.25 | No | -0.50 |
| 32 | **College Street** | No | -0.50 | No | -0.25 | No | -0.50 |

[Scoring Pattern: If Yes: +0.50 for Independent Variable and +0.25 for dependent Variable; If No: -0.50 for Independent Variable; -0.25 for dependent Variable; In case of N/A: The scoring pattern is same as ‘If No’]

Variable: **Permanent Encroachment**

| S.No | | 4 | | | | | | | |
| --- | --- | --- | --- | --- | --- | --- | --- | --- | --- |
| Criterion | | Permanent Encroachment | | | | | | | |
| Sub Criterion | | Absence of Place of religious interest (temple/ churches/ mosque) within or along the footpath? | **Associated Score** | | Absence of 'Encroachment' by existing establishments on to the footpath | **Associated Score** | | Absence of 'Communal open bath' within or along the footpath | **Associated Score** |
| Variable Type | | ***Independent*** | | | | | | | |
| Marking logic | | Beneficial if Absent | | | | | | | |
| 1 | Nirmal Chandra Dey Street | Yes | | 0.50 | No | -0.50 | Yes | | 0.50 |
| 2 | Bowbazar Crossing to New Bowbazar Lane | Yes | | 0.50 | No | -0.50 | Yes | | 0.50 |
| 3 | New Bowbazar lane | Yes | | 0.50 | No | -0.50 | Yes | | 0.50 |
| 4 | New Bowbazar Lane to Kenderdine Lane | Yes | | 0.50 | Yes | 0.50 | No | | -0.50 |
| 5 | Kenderdine Lane | No | | -0.50 | Yes | 0.50 | Yes | | 0.50 |
| 6 | Kenderdine Lane to Central Avenue | No | | -0.50 | No | -0.50 | Yes | | 0.50 |
| 7 | Central Avenue (GATE 4_Yogayog Bhawan) | No | | -0.50 | No | -0.50 | Yes | | 0.50 |
| 8 | Central Metro(GATE 1_Indian Airlines) | No | | -0.50 | No | -0.50 | Yes | | 0.50 |
| 9 | Central Avenue to Bow Street | Yes | | 0.50 | No | -0.50 | Yes | | 0.50 |
| 10 | Bow Street | Yes | | 0.50 | No | -0.50 | Yes | | 0.50 |
| 11 | Bow Street to Metcalfe Street | No | | -0.50 | No | -0.50 | No | | -0.50 |
| 12 | Metcalfe Street | Yes | | 0.50 | No | -0.50 | Yes | | 0.50 |
| 13 | Metcalfe Street to Bentinck Street | Yes | | 0.50 | No | -0.50 | Yes | | 0.50 |
| 14 | Bentinck Street | Yes | | 0.50 | No | -0.50 | Yes | | 0.50 |
| 15 | Rabindra Sarani Rd. | Yes | | 0.50 | No | -0.50 | Yes | | 0.50 |
| 16 | Rabindra Sarani Rd. to Chatawalla Gully | Yes | | 0.50 | No | -0.50 | Yes | | 0.50 |
| 17 | Chatawalla Gully | Yes | | 0.50 | Yes | 0.50 | Yes | | 0.50 |
| 18 | Chatawalla Gully to Phears Bye Lane | Yes | | 0.50 | No | -0.50 | Yes | | 0.50 |
| 19 | Phears Bye Lane | Yes | | 0.50 | No | -0.50 | Yes | | 0.50 |
| 20 | Phears Bye Lane to Phears Lane | No | | -0.50 | No | -0.50 | No | | -0.50 |
| 21 | Phears Lane | Yes | | 0.50 | No | -0.50 | Yes | | 0.50 |
| 22 | Phears Lane to Giri Babu lane | Yes | | 0.50 | No | -0.50 | Yes | | 0.50 |
| 23 | Giri Babu lane | Yes | | 0.50 | Yes | 0.50 | Yes | | 0.50 |
| 24 | Giri Babu lane to Central Avenue | Yes | | 0.50 | No | -0.50 | Yes | | 0.50 |
| 25 | Central Metro (GATE 2_Lalbazar) | Yes | | 0.50 | Yes | 0.50 | Yes | | 0.50 |
| 26 | Central Avenue (GATE 3_RITES) | Yes | | 0.50 | Yes | 0.50 | Yes | | 0.50 |
| 27 | Central Avenue to Gangadhar Babu Lane | No | | -0.50 | No | -0.50 | No | | -0.50 |
| 28 | Gangadhar Babu lane | No | | -0.50 | No | -0.50 | Yes | | 0.50 |
| 29 | Gangadhar Babu Lane to Bibi Rozio Lane | No | | -0.50 | No | -0.50 | No | | -0.50 |
| 30 | Bibi Rozio Lane | Yes | | 0.50 | Yes | 0.50 | Yes | | 0.50 |
| 31 | Bibi Rozio Lane to Bowbazar Crossing | Yes | | 0.50 | No | -0.50 | No | | -0.50 |
| 32 | College Street | No | | -0.50 | No | -0.50 | No | | -0.50 |

[Scoring Pattern: If Yes: +0.50 for Independent Variable and +0.25 for dependent Variable; If No: -0.50 for Independent Variable; -0.25 for dependent Variable]

Variable: **Bus Stop**

| S.No | | 5 | | | | | |
| --- | --- | --- | --- | --- | --- | --- | --- |
| Criterion | | Bus Stop | | | | | |
| Sub Criterion | | Absence of Informal stoppage for Bus | **Associated Score** | Bus Shelter **(if Bus Stops)** | **Associated Score** | Is 'Bus Shelter' functional **(if Bus Shelter is present)** | **Associated Score** |
| Variable Type | | ***Independent*** | | ***Dependent*** | | | |
| Marking logic | | Beneficial if Absent | | Beneficial if Present | | | |
| 1 | **Nirmal Chandra Dey Street** | No | -0.50 | No | -0.25 | No | -0.25 |
| 2 | **Bowbazar Crossing to New Bowbazar Lane** | No | -0.50 | No | -0.25 | No | -0.25 |
| 3 | **New Bowbazar lane** | Yes | 0.50 | N/A | -0.25 | N/A | -0.25 |
| 4 | **New Bowbazar Lane to Kenderdine Lane** | Yes | 0.50 | N/A | -0.25 | N/A | -0.25 |
| 5 | **Kenderdine Lane** | Yes | 0.50 | N/A | -0.25 | N/A | -0.25 |
| 6 | **Kenderdine Lane to Central Avenue** | No | -0.50 | No | -0.25 | No | -0.25 |
| 7 | **Central Avenue (GATE 4_Yogayog Bhawan)** | No | -0.50 | No | -0.25 | No | -0.25 |
| 8 | **Central Metro(GATE 1_Indian Airlines)** | No | -0.50 | No | -0.25 | No | -0.25 |
| 9 | **Central Avenue to Bow Street** | No | -0.50 | Yes | 0.25 | No | -0.25 |
| 10 | **Bow Street** | Yes | 0.50 | N/A | -0.25 | N/A | -0.25 |
| 11 | **Bow Street to Metcalfe Street** | No | -0.50 | No | -0.25 | No | -0.25 |
| 12 | **Metcalfe Street** | Yes | 0.50 | N/A | -0.25 | N/A | -0.25 |
| 13 | **Metcalfe Street to Bentinck Street** | Yes | 0.50 | N/A | -0.25 | N/A | -0.25 |
| 14 | **Bentinck Street** | No | -0.50 | No | -0.25 | No | -0.25 |
| 15 | **Rabindra Sarani Rd.** | No | -0.50 | No | -0.25 | No | -0.25 |
| 16 | **Rabindra Sarani Rd. to Chatawalla Gully** | No | -0.50 | No | -0.25 | No | -0.25 |
| 17 | **Chatawalla Gully** | Yes | 0.50 | N/A | -0.25 | N/A | -0.25 |
| 18 | **Chatawalla Gully to Phears Bye Lane** | Yes | 0.50 | N/A | -0.25 | N/A | -0.25 |
| 19 | **Phears Bye Lane** | Yes | 0.50 | N/A | -0.25 | N/A | -0.25 |
| 20 | **Phears Bye Lane to Phears Lane** | No | -0.50 | No | -0.25 | No | -0.25 |
| 21 | **Phears Lane** | Yes | 0.50 | N/A | -0.25 | N/A | -0.25 |
| 22 | **Phears Lane to Giri Babu lane** | Yes | 0.50 | N/A | -0.25 | N/A | -0.25 |
| 23 | **Giri Babu lane** | Yes | 0.50 | N/A | -0.25 | N/A | -0.25 |
| 24 | **Giri Babu lane to Central Avenue** | No | -0.50 | No | -0.25 | No | -0.25 |
| 25 | **Central Metro (GATE 2_Lalbazar)** | No | -0.50 | No | -0.25 | No | -0.25 |
| 26 | **Central Avenue (GATE 3_RITES)** | No | -0.50 | No | -0.25 | No | -0.25 |
| 27 | **Central Avenue to Gangadhar Babu Lane** | No | -0.50 | No | -0.25 | No | -0.25 |
| 28 | **Gangadhar Babu lane** | Yes | 0.50 | N/A | -0.25 | N/A | -0.25 |
| 29 | **Gangadhar Babu Lane to Bibi Rozio Lane** | Yes | 0.50 | N/A | -0.25 | N/A | -0.25 |
| 30 | **Bibi Rozio Lane** | Yes | 0.50 | N/A | -0.25 | N/A | -0.25 |
| 31 | **Bibi Rozio Lane to Bowbazar Crossing** | Yes | 0.50 | N/A | -0.25 | N/A | -0.25 |
| 32 | **College Street** | No | -0.50 | No | -0.25 | No | -0.25 |

[Scoring Pattern: If Yes: +0.50 for Independent Variable and +0.25 for dependent Variable; If No: -0.50 for Independent Variable; -0.25 for dependent Variable; In case of N/A: The scoring pattern is same as ‘If No’]

Variable: **Metro Rail Entrance**

| S.No | | 6 | | | |
| --- | --- | --- | --- | --- | --- |
| Criterion | | Metro Rail Entrance | | | |
| Sub Criterion | | Absence of Entrance connected to the footpath | **Associated Score** | Is the Entrance functional **(if Metro Rail Entrance is present)** | **Associated Score** |
| Variable Type | | ***Independent*** | | ***Dependent*** | |
| Marking logic | | Beneficial if Absent | | Beneficial if Present | |
| 1 | **Nirmal Chandra Dey Street** | Yes | 0.50 | N/A | -0.25 |
| 2 | **Bowbazar Crossing to New Bowbazar Lane** | Yes | 0.50 | N/A | -0.25 |
| 3 | **New Bowbazar lane** | Yes | 0.50 | N/A | -0.25 |
| 4 | **New Bowbazar Lane to Kenderdine Lane** | Yes | 0.50 | N/A | -0.25 |
| 5 | **Kenderdine Lane** | Yes | 0.50 | N/A | -0.25 |
| 6 | **Kenderdine Lane to Central Avenue** | No | -0.50 | **No** | -0.25 |
| 7 | **Central Avenue (GATE 4_Yogayog Bhawan)** | No | -0.50 | **No** | -0.25 |
| 8 | **Central Metro(GATE 1_Indian Airlines)** | No | -0.50 | Yes | 0.25 |
| 9 | **Central Avenue to Bow Street** | No | -0.50 | Yes | 0.25 |
| 10 | **Bow Street** | Yes | 0.50 | N/A | -0.25 |
| 11 | **Bow Street to Metcalfe Street** | Yes | 0.50 | N/A | -0.25 |
| 12 | **Metcalfe Street** | Yes | 0.50 | N/A | -0.25 |
| 13 | **Metcalfe Street to Bentinck Street** | Yes | 0.50 | N/A | -0.25 |
| 14 | **Bentinck Street** | Yes | 0.50 | N/A | -0.25 |
| 15 | **Rabindra Sarani Rd.** | Yes | 0.50 | N/A | -0.25 |
| 16 | **Rabindra Sarani Rd. to Chatawalla Gully** | Yes | 0.50 | N/A | -0.25 |
| 17 | **Chatawalla Gully** | Yes | 0.50 | N/A | -0.25 |
| 18 | **Chatawalla Gully to Phears Bye Lane** | Yes | 0.50 | N/A | -0.25 |
| 19 | **Phears Bye Lane** | Yes | 0.50 | N/A | -0.25 |
| 20 | **Phears Bye Lane to Phears Lane** | Yes | 0.50 | N/A | -0.25 |
| 21 | **Phears Lane** | Yes | 0.50 | N/A | -0.25 |
| 22 | **Phears Lane to Giri Babu lane** | Yes | 0.50 | N/A | -0.25 |
| 23 | **Giri Babu lane** | Yes | 0.50 | N/A | -0.25 |
| 24 | **Giri Babu lane to Central Avenue** | No | -0.50 | Yes | 0.25 |
| 25 | **Central Metro (GATE 2_Lalbazar)** | No | -0.50 | Yes | 0.25 |
| 26 | **Central Avenue (GATE 3_RITES)** | No | -0.50 | **No** | -0.25 |
| 27 | **Central Avenue to Gangadhar Babu Lane** | No | -0.50 | Yes | 0.25 |
| 28 | **Gangadhar Babu lane** | Yes | 0.50 | N/A | -0.25 |
| 29 | **Gangadhar Babu Lane to Bibi Rozio Lane** | Yes | 0.50 | N/A | -0.25 |
| 30 | **Bibi Rozio Lane** | Yes | 0.50 | N/A | -0.25 |
| 31 | **Bibi Rozio Lane to Bowbazar Crossing** | Yes | 0.50 | N/A | -0.25 |
| 32 | **College Street** | Yes | 0.50 | N/A | -0.25 |

[Scoring Pattern: If Yes: +0.50 for Independent Variable and +0.25 for dependent Variable; If No: -0.50 for Independent Variable; -0.25 for dependent Variable; In case of N/A: The scoring pattern is same as ‘If No’]

Variable: **Railings**

| S.No | | 7 | | | |
| --- | --- | --- | --- | --- | --- |
| Criterion | | Railings | | | |
| Sub Criterion | | Railings (pedestrian guard rails) on the edge of the footpath | **Associated Score** | Thorough railings with minimum 1500mm height and clear visibility **(if Railings are present)** | **Associated Score** |
| Variable Type | | ***Independent*** | | ***Dependent*** | |
| Marking logic | | Beneficial if Present | | | |
| 1 | **Nirmal Chandra Dey Street** | No | -0.50 | N/A | -0.25 |
| 2 | **Bowbazar Crossing to New Bowbazar Lane** | No | -0.50 | N/A | -0.25 |
| 3 | **New Bowbazar lane** | No | -0.50 | N/A | -0.25 |
| 4 | **New Bowbazar Lane to Kenderdine Lane** | No | -0.50 | N/A | -0.25 |
| 5 | **Kenderdine Lane** | No | -0.50 | N/A | -0.25 |
| 6 | **Kenderdine Lane to Central Avenue** | Yes | 0.50 | Yes | 0.25 |
| 7 | **Central Avenue (GATE 4_Yogayog Bhawan)** | Yes | 0.50 | Yes | 0.25 |
| 8 | **Central Metro(GATE 1_Indian Airlines)** | Yes | 0.50 | Yes | 0.25 |
| 9 | **Central Avenue to Bow Street** | Yes | 0.50 | **No** | -0.25 |
| 10 | **Bow Street** | No | -0.50 | N/A | -0.25 |
| 11 | **Bow Street to Metcalfe Street** | Yes | 0.50 | No | -0.25 |
| 12 | **Metcalfe Street** | No | -0.50 | N/A | -0.25 |
| 13 | **Metcalfe Street to Bentinck Street** | Yes | 0.50 | No | -0.25 |
| 14 | **Bentinck Street** | No | -0.50 | N/A | -0.25 |
| 15 | **Rabindra Sarani Rd.** | No | -0.50 | N/A | -0.25 |
| 16 | **Rabindra Sarani Rd. to Chatawalla Gully** | Yes | 0.50 | No | -0.25 |
| 17 | **Chatawalla Gully** | No | -0.50 | N/A | -0.25 |
| 18 | **Chatawalla Gully to Phears Bye Lane** | Yes | 0.50 | No | -0.25 |
| 19 | **Phears Bye Lane** | No | -0.50 | N/A | -0.25 |
| 20 | **Phears Bye Lane to Phears Lane** | Yes | 0.50 | No | -0.25 |
| 21 | **Phears Lane** | No | -0.50 | N/A | -0.25 |
| 22 | **Phears Lane to Giri Babu lane** | Yes | 0.50 | No | -0.25 |
| 23 | **Giri Babu lane** | No | -0.50 | N/A | -0.25 |
| 24 | **Giri Babu lane to Central Avenue** | Yes | 0.50 | No | -0.25 |
| 25 | **Central Metro (GATE 2_Lalbazar)** | Yes | 0.50 | Yes | 0.25 |
| 26 | **Central Avenue (GATE 3_RITES)** | Yes | 0.50 | Yes | 0.25 |
| 27 | **Central Avenue to Gangadhar Babu Lane** | No | -0.50 | N/A | -0.25 |
| 28 | **Gangadhar Babu lane** | No | -0.50 | N/A | -0.25 |
| 29 | **Gangadhar Babu Lane to Bibi Rozio Lane** | No | -0.50 | N/A | -0.25 |
| 30 | **Bibi Rozio Lane** | No | -0.50 | N/A | -0.25 |
| 31 | **Bibi Rozio Lane to Bowbazar Crossing** | No | -0.50 | N/A | -0.25 |
| 32 | **College Street** | No | -0.50 | N/A | -0.25 |

[Scoring Pattern: If Yes: +0.50 for Independent Variable and +0.25 for dependent Variable; If No: -0.50 for Independent Variable; -0.25 for dependent Variable; In case of N/A: The scoring pattern is same as ‘If No’]

Variable: **Storm Water Drains**

| S.No | | 8 | | | |
| --- | --- | --- | --- | --- | --- |
| Criterion | | Storm Water Drains | | | |
| Sub Criterion | | Storm Water Drains along footpath | **Associated Score** | Functional Storm Water Drains **(if Storm Water Drains are present)** | **Associated Score** |
| Variable Type | | ***Independent*** | | ***Dependent*** | |
| Marking logic | | Beneficial if Present | | | |
| 1 | **Nirmal Chandra Dey Street** | Yes | 0.50 | Yes | 0.25 |
| 2 | **Bowbazar Crossing to New Bowbazar Lane** | Yes | 0.50 | Yes | 0.25 |
| 3 | **New Bowbazar lane** | Yes | 0.50 | Yes | 0.25 |
| 4 | **New Bowbazar Lane to Kenderdine Lane** | Yes | 0.50 | Yes | 0.25 |
| 5 | **Kenderdine Lane** | No | -0.50 | N/A | -0.25 |
| 6 | **Kenderdine Lane to Central Avenue** | Yes | 0.50 | Yes | 0.25 |
| 7 | **Central Avenue (GATE 4_Yogayog Bhawan)** | Yes | 0.50 | Yes | 0.25 |
| 8 | **Central Metro(GATE 1_Indian Airlines)** | Yes | 0.50 | Yes | 0.25 |
| 9 | **Central Avenue to Bow Street** | Yes | 0.50 | Yes | 0.25 |
| 10 | **Bow Street** | Yes | 0.50 | Yes | 0.25 |
| 11 | **Bow Street to Metcalfe Street** | Yes | 0.50 | Yes | 0.25 |
| 12 | **Metcalfe Street** | Yes | 0.50 | Yes | 0.25 |
| 13 | **Metcalfe Street to Bentinck Street** | Yes | 0.50 | Yes | 0.25 |
| 14 | **Bentinck Street** | Yes | 0.50 | Yes | 0.25 |
| 15 | **Rabindra Sarani Rd.** | Yes | 0.50 | Yes | 0.25 |
| 16 | **Rabindra Sarani Rd. to Chatawalla Gully** | Yes | 0.50 | Yes | 0.25 |
| 17 | **Chatawalla Gully** | Yes | 0.50 | Yes | 0.25 |
| 18 | **Chatawalla Gully to Phears Bye Lane** | Yes | 0.50 | Yes | 0.25 |
| 19 | **Phears Bye Lane** | Yes | 0.50 | Yes | 0.25 |
| 20 | **Phears Bye Lane to Phears Lane** | Yes | 0.50 | Yes | 0.25 |
| 21 | **Phears Lane** | Yes | 0.50 | Yes | 0.25 |
| 22 | **Phears Lane to Giri Babu lane** | Yes | 0.50 | Yes | 0.25 |
| 23 | **Giri Babu lane** | No | -0.50 | N/A | -0.25 |
| 24 | **Giri Babu lane to Central Avenue** | Yes | 0.50 | Yes | 0.25 |
| 25 | **Central Metro (GATE 2_Lalbazar)** | Yes | 0.50 | Yes | 0.25 |
| 26 | **Central Avenue (GATE 3_RITES)** | Yes | 0.50 | Yes | 0.25 |
| 27 | **Central Avenue to Gangadhar Babu Lane** | Yes | 0.50 | Yes | 0.25 |
| 28 | **Gangadhar Babu lane** | Yes | 0.50 | Yes | 0.25 |
| 29 | **Gangadhar Babu Lane to Bibi Rozio Lane** | Yes | 0.50 | No | -0.25 |
| 30 | **Bibi Rozio Lane** | No | -0.50 | N/A | -0.25 |
| 31 | **Bibi Rozio Lane to Bowbazar Crossing** | Yes | 0.50 | Yes | 0.25 |
| 32 | **College Street** | Yes | 0.50 | Yes | 0.25 |

[Scoring Pattern: If Yes: +0.50 for Independent Variable and +0.25 for dependent Variable; If No: -0.50 for Independent Variable; -0.25 for dependent Variable; In case of N/A: The scoring pattern is same as ‘If No’]

Variable: P**ublic Toilet (Restroom)**

| S.No | | 9 | | | |
| --- | --- | --- | --- | --- | --- |
| Criterion | | Public Toilet (Restroom) | | | |
| Sub Criterion | | Public Toilet within the footpath | **Associated Score** | Functional Public Toilet **(if Public Toilet is present)** | **Associated Score** |
| Variable Type | | ***Independent*** | | ***Dependent*** | |
| Marking logic | | Beneficial if Present | | | |
| 1 | **Nirmal Chandra Dey Street** | No | -0.50 | N/A | -0.25 |
| 2 | **Bowbazar Crossing to New Bowbazar Lane** | No | -0.50 | N/A | -0.25 |
| 3 | **New Bowbazar lane** | No | -0.50 | N/A | -0.25 |
| 4 | **New Bowbazar Lane to Kenderdine Lane** | No | -0.50 | N/A | -0.25 |
| 5 | **Kenderdine Lane** | Yes | 0.50 | Yes | 0.25 |
| 6 | **Kenderdine Lane to Central Avenue** | No | -0.50 | N/A | -0.25 |
| 7 | **Central Avenue (GATE 4_Yogayog Bhawan)** | No | -0.50 | N/A | -0.25 |
| 8 | **Central Metro(GATE 1_Indian Airlines)** | No | -0.50 | N/A | -0.25 |
| 9 | **Central Avenue to Bow Street** | No | -0.50 | N/A | -0.25 |
| 10 | **Bow Street** | No | -0.50 | N/A | -0.25 |
| 11 | **Bow Street to Metcalfe Street** | No | -0.50 | N/A | -0.25 |
| 12 | **Metcalfe Street** | No | -0.50 | N/A | -0.25 |
| 13 | **Metcalfe Street to Bentinck Street** | No | -0.50 | N/A | -0.25 |
| 14 | **Bentinck Street** | No | -0.50 | N/A | -0.25 |
| 15 | **Rabindra Sarani Rd.** | No | -0.50 | N/A | -0.25 |
| 16 | **Rabindra Sarani Rd. to Chatawalla Gully** | No | -0.50 | N/A | -0.25 |
| 17 | **Chatawalla Gully** | No | -0.50 | N/A | -0.25 |
| 18 | **Chatawalla Gully to Phears Bye Lane** | No | -0.50 | N/A | -0.25 |
| 19 | **Phears Bye Lane** | No | -0.50 | N/A | -0.25 |
| 20 | **Phears Bye Lane to Phears Lane** | No | -0.50 | N/A | -0.25 |
| 21 | **Phears Lane** | No | -0.50 | N/A | -0.25 |
| 22 | **Phears Lane to Giri Babu lane** | No | -0.50 | N/A | -0.25 |
| 23 | **Giri Babu lane** | No | -0.50 | N/A | -0.25 |
| 24 | **Giri Babu lane to Central Avenue** | No | -0.50 | N/A | -0.25 |
| 25 | **Central Metro (GATE 2_Lalbazar)** | No | -0.50 | N/A | -0.25 |
| 26 | **Central Avenue (GATE 3_RITES)** | No | -0.50 | N/A | -0.25 |
| 27 | **Central Avenue to Gangadhar Babu Lane** | No | -0.50 | N/A | -0.25 |
| 28 | **Gangadhar Babu lane** | No | -0.50 | N/A | -0.25 |
| 29 | **Gangadhar Babu Lane to Bibi Rozio Lane** | No | -0.50 | N/A | -0.25 |
| 30 | **Bibi Rozio Lane** | No | -0.50 | N/A | -0.25 |
| 31 | **Bibi Rozio Lane to Bowbazar Crossing** | No | -0.50 | N/A | -0.25 |
| 32 | **College Street** | No | -0.50 | N/A | -0.25 |

[Scoring Pattern: If Yes: +0.50 for Independent Variable and +0.25 for dependent Variable; If No: -0.50 for Independent Variable; -0.25 for dependent Variable; In case of N/A: The scoring pattern is same as ‘If No’]

Variable: **Trash Bins**

| S.No | | 10 | | | | | |
| --- | --- | --- | --- | --- | --- | --- | --- |
| Criterion | | Trash Bins | | | | | |
| Sub Criterion | | Trash Bins within the footpath | **Associated Score** | Functional Trash Bins **(if Trash Bins are present)** | **Associated Score** | Trash Bins located away from the line of pedestrian flow **(if Trash Bins present)** | **Associated Score** |
| Variable Type | | ***Independent*** | | ***Dependent*** | | | |
| Marking logic | | Beneficial if Present | | | | | |
| 1 | **Nirmal Chandra Dey Street** | No | -0.50 | N/A | -0.25 | N/A | -0.25 |
| 2 | **Bowbazar Crossing to New Bowbazar Lane** | No | -0.50 | N/A | -0.25 | N/A | -0.25 |
| 3 | **New Bowbazar lane** | Yes | 0.50 | Yes | 0.25 | Yes | 0.25 |
| 4 | **New Bowbazar Lane to Kenderdine Lane** | No | -0.50 | N/A | -0.25 | N/A | -0.25 |
| 5 | **Kenderdine Lane** | Yes | 0.50 | No | -0.25 | Yes | 0.25 |
| 6 | **Kenderdine Lane to Central Avenue** | No | -0.50 | N/A | -0.25 | N/A | -0.25 |
| 7 | **Central Avenue (GATE 4_Yogayog Bhawan)** | No | -0.50 | N/A | -0.25 | N/A | -0.25 |
| 8 | **Central Metro(GATE 1_Indian Airlines)** | No | -0.50 | N/A | -0.25 | N/A | -0.25 |
| 9 | **Central Avenue to Bow Street** | No | -0.50 | N/A | -0.25 | N/A | -0.25 |
| 10 | **Bow Street** | Yes | 0.50 | Yes | 0.25 | Yes | 0.25 |
| 11 | **Bow Street to Metcalfe Street** | No | -0.50 | N/A | -0.25 | N/A | -0.25 |
| 12 | **Metcalfe Street** | No | -0.50 | N/A | -0.25 | N/A | -0.25 |
| 13 | **Metcalfe Street to Bentinck Street** | No | -0.50 | N/A | -0.25 | N/A | -0.25 |
| 14 | **Bentinck Street** | No | -0.50 | N/A | -0.25 | N/A | -0.25 |
| 15 | **Rabindra Sarani Rd.** | No | -0.50 | N/A | -0.25 | N/A | -0.25 |
| 16 | **Rabindra Sarani Rd. to Chatawalla Gully** | No | -0.50 | N/A | -0.25 | N/A | -0.25 |
| 17 | **Chatawalla Gully** | No | -0.50 | N/A | -0.25 | N/A | -0.25 |
| 18 | **Chatawalla Gully to Phears Bye Lane** | No | -0.50 | N/A | -0.25 | N/A | -0.25 |
| 19 | **Phears Bye Lane** | No | -0.50 | N/A | -0.25 | N/A | -0.25 |
| 20 | **Phears Bye Lane to Phears Lane** | No | -0.50 | N/A | -0.25 | N/A | -0.25 |
| 21 | **Phears Lane** | Yes | 0.50 | Yes | 0.25 | Yes | 0.25 |
| 22 | **Phears Lane to Giri Babu lane** | No | -0.50 | N/A | -0.25 | N/A | -0.25 |
| 23 | **Giri Babu lane** | No | -0.50 | N/A | -0.25 | N/A | -0.25 |
| 24 | **Giri Babu lane to Central Avenue** | No | -0.50 | N/A | -0.25 | N/A | -0.25 |
| 25 | **Central Metro (GATE 2_Lalbazar)** | No | -0.50 | N/A | -0.25 | N/A | -0.25 |
| 26 | **Central Avenue (GATE 3_RITES)** | No | -0.50 | N/A | -0.25 | N/A | -0.25 |
| 27 | **Central Avenue to Gangadhar Babu Lane** | No | -0.50 | N/A | -0.25 | N/A | -0.25 |
| 28 | **Gangadhar Babu lane** | No | -0.50 | N/A | -0.25 | N/A | -0.25 |
| 29 | **Gangadhar Babu Lane to Bibi Rozio Lane** | No | -0.50 | N/A | -0.25 | N/A | -0.25 |
| 30 | **Bibi Rozio Lane** | No | -0.50 | N/A | -0.25 | N/A | -0.25 |
| 31 | **Bibi Rozio Lane to Bowbazar Crossing** | No | -0.50 | N/A | -0.25 | N/A | -0.25 |
| 32 | **College Street** | No | -0.50 | N/A | -0.25 | N/A | -0.25 |

[Scoring Pattern: If Yes: +0.50 for Independent Variable and +0.25 for dependent Variable; If No: -0.50 for Independent Variable; -0.25 for dependent Variable; In case of N/A: The scoring pattern is same as ‘If No’]

Variable: **Street Lights**

| S.No | | 11 | | | | | |
| --- | --- | --- | --- | --- | --- | --- | --- |
| Criterion | | Street Lights | | | | | |
| Sub Criterion | | Street Lights within the footpath | **Associated Score** | Functional Street Lights **(if Street Lights are present)** | **Associated Score** | Light Poles away from pedestrian flow or if present, is demarcated with a tactile marking of a minimum 600mm around it **(if Street Lights are present)** | **Associated Score** |
| Variable Type | | ***Independent*** |  | ***Dependent*** | | | |
| Marking logic | | Beneficial if Present | | | | | |
| 1 | **Nirmal Chandra Dey Street** | Yes | 0.50 | Yes | 0.25 | No | -0.25 |
| 2 | **Bowbazar Crossing to New Bowbazar Lane** | Yes | 0.50 | Yes | 0.25 | No | -0.25 |
| 3 | **New Bowbazar lane** | Yes | 0.50 | Yes | 0.25 | No | -0.25 |
| 4 | **New Bowbazar Lane to Kenderdine Lane** | Yes | 0.50 | Yes | 0.25 | No | -0.25 |
| 5 | **Kenderdine Lane** | Yes | 0.50 | Yes | 0.25 | Yes | 0.25 |
| 6 | **Kenderdine Lane to Central Avenue** | Yes | 0.50 | Yes | 0.25 | No | -0.25 |
| 7 | **Central Avenue (GATE 4_Yogayog Bhawan)** | Yes | 0.50 | No | -0.25 | No | -0.25 |
| 8 | **Central Metro(GATE 1_Indian Airlines)** | Yes | 0.50 | Yes | 0.25 | No | -0.25 |
| 9 | **Central Avenue to Bow Street** | Yes | 0.50 | Yes | 0.25 | No | -0.25 |
| 10 | **Bow Street** | Yes | 0.50 | Yes | 0.25 | No | -0.25 |
| 11 | **Bow Street to Metcalfe Street** | Yes | 0.50 | Yes | 0.25 | No | -0.25 |
| 12 | **Metcalfe Street** | Yes | 0.50 | Yes | 0.25 | No | -0.25 |
| 13 | **Metcalfe Street to Bentinck Street** | Yes | 0.50 | Yes | 0.25 | No | -0.25 |
| 14 | **Bentinck Street** | Yes | 0.50 | Yes | 0.25 | No | -0.25 |
| 15 | **Rabindra Sarani Rd.** | Yes | 0.50 | Yes | 0.25 | No | -0.25 |
| 16 | **Rabindra Sarani Rd. to Chatawalla Gully** | Yes | 0.50 | Yes | 0.25 | No | -0.25 |
| 17 | **Chatawalla Gully** | Yes | 0.50 | Yes | 0.25 | No | -0.25 |
| 18 | **Chatawalla Gully to Phears Bye Lane** | Yes | 0.50 | Yes | 0.25 | No | -0.25 |
| 19 | **Phears Bye Lane** | Yes | 0.50 | Yes | 0.25 | No | -0.25 |
| 20 | **Phears Bye Lane to Phears Lane** | Yes | 0.50 | Yes | 0.25 | No | -0.25 |
| 21 | **Phears Lane** | Yes | 0.50 | Yes | 0.25 | No | -0.25 |
| 22 | **Phears Lane to Giri Babu lane** | Yes | 0.50 | Yes | 0.25 | No | -0.25 |
| 23 | **Giri Babu lane** | Yes | 0.50 | Yes | 0.25 | No | -0.25 |
| 24 | **Giri Babu lane to Central Avenue** | Yes | 0.50 | Yes | 0.25 | No | -0.25 |
| 25 | **Central Metro (GATE 2_Lalbazar)** | Yes | 0.50 | Yes | 0.25 | No | -0.25 |
| 26 | **Central Avenue (GATE 3_RITES)** | Yes | 0.50 | Yes | 0.25 | No | -0.25 |
| 27 | **Central Avenue to Gangadhar Babu Lane** | Yes | 0.50 | Yes | 0.25 | No | -0.25 |
| 28 | **Gangadhar Babu lane** | Yes | 0.50 | Yes | 0.25 | No | -0.25 |
| 29 | **Gangadhar Babu Lane to Bibi Rozio Lane** | Yes | 0.50 | Yes | 0.25 | No | -0.25 |
| 30 | **Bibi Rozio Lane** | Yes | 0.50 | No | -0.25 | Yes | 0.25 |
| 31 | **Bibi Rozio Lane to Bowbazar Crossing** | Yes | 0.50 | Yes | 0.25 | No | -0.25 |
| 32 | **College Street** | Yes | 0.50 | Yes | 0.25 | No | -0.25 |

[Scoring Pattern: If Yes: +0.50 for Independent Variable and +0.25 for dependent Variable; If No: -0.50 for Independent Variable; -0.25 for dependent Variable]

Variable: **Flooring**

| S.No | | 12 | | | | | |
| --- | --- | --- | --- | --- | --- | --- | --- |
| Criterion | | Flooring | | | | | |
| Sub Criterion | | Satisfactory Cross Fall (i.e. <1:50) | **Associated Score** | Tactile Marking | **Associated Score** | Anti-skid/ matt finish tiles in footpath and kerb | **Associated Score** |
| Variable Type | | ***Independent*** | | | | | |
| Marking logic | | Beneficial if Present | | | | | |
| 1 | **Nirmal Chandra Dey Street** | Yes | 0.50 | No | -0.50 | No | -0.50 |
| 2 | **Bowbazar Crossing to New Bowbazar Lane** | Yes | 0.50 | No | -0.50 | No | -0.50 |
| 3 | **New Bowbazar lane** | Yes | 0.50 | No | -0.50 | No | -0.50 |
| 4 | **New Bowbazar Lane to Kenderdine Lane** | Yes | 0.50 | No | -0.50 | No | -0.50 |
| 5 | **Kenderdine Lane** | No | -0.50 | No | -0.50 | No | -0.50 |
| 6 | **Kenderdine Lane to Central Avenue** | No | -0.50 | No | -0.50 | No | -0.50 |
| 7 | **Central Avenue (GATE 4_Yogayog Bhawan)** | No | -0.50 | No | -0.50 | No | -0.50 |
| 8 | **Central Metro(GATE 1_Indian Airlines)** | Yes | 0.50 | No | -0.50 | No | -0.50 |
| 9 | **Central Avenue to Bow Street** | Yes | 0.50 | No | -0.50 | No | -0.50 |
| 10 | **Bow Street** | Yes | 0.50 | No | -0.50 | No | -0.50 |
| 11 | **Bow Street to Metcalfe Street** | Yes | 0.50 | No | -0.50 | Yes | 0.50 |
| 12 | **Metcalfe Street** | Yes | 0.50 | No | -0.50 | No | -0.50 |
| 13 | **Metcalfe Street to Bentinck Street** | Yes | 0.50 | No | -0.50 | No | -0.50 |
| 14 | **Bentinck Street** | No | -0.50 | No | -0.50 | Yes | 0.50 |
| 15 | **Rabindra Sarani Rd.** | No | -0.50 | No | -0.50 | Yes | 0.50 |
| 16 | **Rabindra Sarani Rd. to Chatawalla Gully** | Yes | 0.50 | No | -0.50 | Yes | 0.50 |
| 17 | **Chatawalla Gully** | Yes | 0.50 | No | -0.50 | Yes | 0.50 |
| 18 | **Chatawalla Gully to Phears Bye Lane** | No | -0.50 | No | -0.50 | Yes | 0.50 |
| 19 | **Phears Bye Lane** | Yes | 0.50 | No | -0.50 | No | -0.50 |
| 20 | **Phears Bye Lane to Phears Lane** | Yes | 0.50 | No | -0.50 | Yes | 0.50 |
| 21 | **Phears Lane** | No | -0.50 | No | -0.50 | No | -0.50 |
| 22 | **Phears Lane to Giri Babu lane** | Yes | 0.50 | No | -0.50 | Yes | 0.50 |
| 23 | **Giri Babu lane** | No | -0.50 | No | -0.50 | No | -0.50 |
| 24 | **Giri Babu lane to Central Avenue** | No | -0.50 | No | -0.50 | No | -0.50 |
| 25 | **Central Metro (GATE 2_Lalbazar)** | No | -0.50 | No | -0.50 | No | -0.50 |
| 26 | **Central Avenue (GATE 3_RITES)** | Yes | 0.50 | No | -0.50 | No | -0.50 |
| 27 | **Central Avenue to Gangadhar Babu Lane** | No | -0.50 | No | -0.50 | No | -0.50 |
| 28 | **Gangadhar Babu lane** | Yes | 0.50 | No | -0.50 | No | -0.50 |
| 29 | **Gangadhar Babu Lane to Bibi Rozio Lane** | Yes | 0.50 | No | -0.50 | No | -0.50 |
| 30 | **Bibi Rozio Lane** | No | -0.50 | No | -0.50 | No | -0.50 |
| 31 | **Bibi Rozio Lane to Bowbazar Crossing** | Yes | 0.50 | No | -0.50 | No | -0.50 |
| 32 | **College Street** | Yes | 0.50 | No | -0.50 | No | -0.50 |

[Scoring Pattern: If Yes: +0.50 for Independent Variable and +0.25 for dependent Variable; If No: -0.50 for Independent Variable; -0.25 for dependent Variable]

Variable: **Manholes**

| S.No | | 13 | | | | | | |
| --- | --- | --- | --- | --- | --- | --- | --- | --- |
| Criterion | | Manholes | | | | | | |
| Sub Criterion | | Manholes within/ along the footpath | **Associated Score** | Drain type' manholes flushed with the pavement surface  **(if Manholes are present)** | **Associated Score** | Grating' type manholes sited away from the pedestrian walkway  **(if Manholes are present)** | | **Associated Score** |
| Variable Type | | ***Independent*** | | ***Dependent*** | | | | |
| Marking logic | | Beneficial if Present | | | | | | |
| 1 | **Nirmal Chandra Dey Street** | Yes | 0.50 | Yes | 0.25 | Yes | 0.25 | |
| 2 | **Bowbazar Crossing to New Bowbazar Lane** | Yes | 0.50 | No | -0.25 | Yes | 0.25 | |
| 3 | **New Bowbazar lane** | Yes | 0.50 | Yes | 0.25 | Yes | 0.25 | |
| 4 | **New Bowbazar Lane to Kenderdine Lane** | Yes | 0.50 | Yes | 0.25 | Yes | 0.25 | |
| 5 | **Kenderdine Lane** | Yes | 0.50 | Yes | 0.25 | Yes | 0.25 | |
| 6 | **Kenderdine Lane to Central Avenue** | Yes | 0.50 | Yes | 0.25 | Yes | 0.25 | |
| 7 | **Central Avenue (GATE 4_Yogayog Bhawan)** | Yes | 0.50 | Yes | 0.25 | Yes | 0.25 | |
| 8 | **Central Metro(GATE 1_Indian Airlines)** | Yes | 0.50 | Yes | 0.25 | No | -0.25 | |
| 9 | **Central Avenue to Bow Street** | Yes | 0.50 | No | -0.25 | Yes | 0.25 | |
| 10 | **Bow Street** | Yes | 0.50 | Yes | 0.25 | Yes | 0.25 | |
| 11 | **Bow Street to Metcalfe Street** | Yes | 0.50 | Yes | 0.25 | No | -0.25 | |
| 12 | **Metcalfe Street** | Yes | 0.50 | Yes | 0.25 | Yes | 0.25 | |
| 13 | **Metcalfe Street to Bentinck Street** | Yes | 0.50 | Yes | 0.25 | No | -0.25 | |
| 14 | **Bentinck Street** | Yes | 0.50 | Yes | 0.25 | No | -0.25 | |
| 15 | **Rabindra Sarani Rd.** | Yes | 0.50 | Yes | 0.25 | No | -0.25 | |
| 16 | **Rabindra Sarani Rd. to Chatawalla Gully** | Yes | 0.50 | Yes | 0.25 | Yes | 0.25 | |
| 17 | **Chatawalla Gully** | Yes | 0.50 | Yes | 0.25 | No | -0.25 | |
| 18 | **Chatawalla Gully to Phears Bye Lane** | Yes | 0.50 | Yes | 0.25 | Yes | 0.25 | |
| 19 | **Phears Bye Lane** | Yes | 0.50 | Yes | 0.25 | No | -0.25 | |
| 20 | **Phears Bye Lane to Phears Lane** | Yes | 0.50 | Yes | 0.25 | Yes | 0.25 | |
| 21 | **Phears Lane** | Yes | 0.50 | Yes | 0.25 | Yes | 0.25 | |
| 22 | **Phears Lane to Giri Babu lane** | Yes | 0.50 | Yes | 0.25 | Yes | 0.25 | |
| 23 | **Giri Babu lane** | Yes | 0.50 | Yes | 0.25 | Yes | 0.25 | |
| 24 | **Giri Babu lane to Central Avenue** | Yes | 0.50 | Yes | 0.25 | Yes | 0.25 | |
| 25 | **Central Metro (GATE 2_Lalbazar)** | Yes | 0.50 | Yes | 0.25 | No | -0.25 | |
| 26 | **Central Avenue (GATE 3_RITES)** | Yes | 0.50 | No | -0.25 | Yes | 0.25 | |
| 27 | **Central Avenue to Gangadhar Babu Lane** | Yes | 0.50 | Yes | 0.25 | Yes | 0.25 | |
| 28 | **Gangadhar Babu lane** | Yes | 0.50 | Yes | 0.25 | Yes | 0.25 | |
| 29 | **Gangadhar Babu Lane to Bibi Rozio Lane** | Yes | 0.50 | Yes | 0.25 | Yes | 0.25 | |
| 30 | **Bibi Rozio Lane** | Yes | 0.50 | Yes | 0.25 | No | -0.25 | |
| 31 | **Bibi Rozio Lane to Bowbazar Crossing** | Yes | 0.50 | Yes | 0.25 | Yes | 0.25 | |
| 32 | **College Street** | Yes | 0.50 | No | -0.25 | Yes | 0.25 | |

[Scoring Pattern: If Yes: +0.50 for Independent Variable and +0.25 for dependent Variable; If No: -0.50 for Independent Variable; -0.25 for dependent Variable]

Variable: **Kerb**

| S.No | | 14 | | | | | | | |
| --- | --- | --- | --- | --- | --- | --- | --- | --- | --- |
| Criterion | | Kerb | | | | | | | |
| Sub Criterion | | Kerb on the edge of footpath | **Associated Score** | Kerb Height of not more than 150mm from the road level **(if Kerb is present)** | **Associated Score** | Minimum 1200mm width and tactile warning **(if Kerb is present)** | **Associated Score** | Corned kerb radius more than 6m **(if Kerb is present)** | **Associated Score** |
| Variable Type | | ***Independent*** | | ***Dependent*** | | | | | |
| Marking logic | | Beneficial if Present | | | | | | | |
| 1 | **Nirmal Chandra Dey Street** | Yes | 0.50 | Yes | 0.25 | Yes | -0.25 | No | -0.25 |
| 2 | **Bowbazar Crossing to New Bowbazar Lane** | Yes | 0.50 | Yes | 0.25 | Yes | -0.25 | No | -0.25 |
| 3 | **New Bowbazar lane** | No | -0.50 | N/A | -0.25 | N/A | -0.25 | N/A | -0.25 |
| 4 | **New Bowbazar Lane to Kenderdine Lane** | Yes | 0.50 | Yes | 0.25 | N/A | -0.25 | No | -0.25 |
| 5 | **Kenderdine Lane** | No | -0.50 | N/A | -0.25 | N/A | -0.25 | N/A | -0.25 |
| 6 | **Kenderdine Lane to Central Avenue** | Yes | 0.50 | Yes | 0.25 | Yes | -0.25 | No | -0.25 |
| 7 | **Central Avenue (GATE 4_Yogayog Bhawan)** | Yes | 0.50 | Yes | 0.25 | N/A | -0.25 | No | -0.25 |
| 8 | **Central Metro(GATE 1_Indian Airlines)** | Yes | 0.50 | Yes | 0.25 | Yes | -0.25 | No | -0.25 |
| 9 | **Central Avenue to Bow Street** | Yes | 0.50 | No | -0.25 | Yes | -0.25 | No | -0.25 |
| 10 | **Bow Street** | No | -0.50 | N/A | -0.25 | N/A | -0.25 | N/A | -0.25 |
| 11 | **Bow Street to Metcalfe Street** | Yes | 0.50 | Yes | 0.25 | Yes | -0.25 | No | -0.25 |
| 12 | **Metcalfe Street** | No | -0.50 | N/A | -0.25 | N/A | -0.25 | N/A | -0.25 |
| 13 | **Metcalfe Street to Bentinck Street** | Yes | 0.50 | No | -0.25 | Yes | -0.25 | No | -0.25 |
| 14 | **Bentinck Street** | Yes | 0.50 | No | -0.25 | Yes | -0.25 | No | -0.25 |
| 15 | **Rabindra Sarani Rd.** | Yes | 0.50 | Yes | 0.25 | Yes | -0.25 | No | -0.25 |
| 16 | **Rabindra Sarani Rd. to Chatawalla Gully** | Yes | 0.50 | No | -0.25 | Yes | 0.25 | No | -0.25 |
| 17 | **Chatawalla Gully** | No | -0.50 | N/A | -0.25 | N/A | -0.25 | N/A | -0.25 |
| 18 | **Chatawalla Gully to Phears Bye Lane** | Yes | 0.50 | No | -0.25 | N/A | 0.25 | No | -0.25 |
| 19 | **Phears Bye Lane** | No | -0.50 | N/A | -0.25 | N/A | -0.25 | N/A | -0.25 |
| 20 | **Phears Bye Lane to Phears Lane** | Yes | 0.50 | No | -0.25 | Yes | -0.25 | No | -0.25 |
| 21 | **Phears Lane** | Yes | 0.50 | No | -0.25 | N/A | -0.25 | No | -0.25 |
| 22 | **Phears Lane to Giri Babu lane** | Yes | 0.50 | No | -0.25 | N/A | -0.25 | No | -0.25 |
| 23 | **Giri Babu lane** | No | -0.50 | N/A | -0.25 | N/A | -0.25 | N/A | -0.25 |
| 24 | **Giri Babu lane to Central Avenue** | Yes | 0.50 | No | -0.25 | Yes | -0.25 | No | -0.25 |
| 25 | **Central Metro (GATE 2_Lalbazar)** | Yes | 0.50 | No | -0.25 | Yes | -0.25 | No | -0.25 |
| 26 | **Central Avenue (GATE 3_RITES)** | Yes | 0.50 | No | -0.25 | N/A | -0.25 | No | -0.25 |
| 27 | **Central Avenue to Gangadhar Babu Lane** | Yes | 0.50 | No | -0.25 | No | -0.25 | No | -0.25 |
| 28 | **Gangadhar Babu lane** | No | -0.50 | N/A | -0.25 | N/A | -0.25 | N/A | -0.25 |
| 29 | **Gangadhar Babu Lane to Bibi Rozio Lane** | Yes | 0.50 | No | -0.25 | N/A | -0.25 | No | -0.25 |
| 30 | **Bibi Rozio Lane** | No | -0.50 | N/A | -0.25 | N/A | -0.25 | N/A | -0.25 |
| 31 | **Bibi Rozio Lane to Bowbazar Crossing** | Yes | 0.50 | No | -0.25 | Yes | -0.25 | No | -0.25 |
| 32 | **College Street** | Yes | 0.50 | No | -0.25 | Yes | -0.25 | No | -0.25 |

[Scoring Pattern: If Yes: +0.50 for Independent Variable and +0.25 for dependent Variable; If No: -0.50 for Independent Variable; -0.25 for dependent Variable; In case of N/A: The scoring pattern is same as ‘If No’]

Variable: **Pedestrian Crossing**

| S.No | | 15 | | | | | | | |
| --- | --- | --- | --- | --- | --- | --- | --- | --- | --- |
| Criterion | | Pedestrian crossing | | | | | | | |
| Sub Criterion | | ‘At-grade' pedestrian crossing (MID-BLOCK crossing) at all intersections along the walkway | **Associated Score** | Signalized Intersection  **(if Crossing is present)** | **Associated Score** | Functional Signalized Intersection  **(if Crossing is present)** | **Associated Score** | Audio Signal **(if Crossing is present)** | **Associated Score** |
| Variable Type | | ***Independent*** | | ***Dependent*** | | | | | |
| Marking logic | | Beneficial if Present | | | | | | | |
| 1 | **Nirmal Chandra Dey Street** | No | 0.50 | Yes | 0.25 | Yes | 0.25 | No | -0.25 |
| 2 | **Bowbazar Crossing to New Bowbazar Lane** | No | -0.50 | Yes | 0.25 | Yes | 0.25 | No | -0.25 |
| 3 | **New Bowbazar lane** | No | -0.50 | No | -0.25 | N/A | -0.25 | No | -0.25 |
| 4 | **New Bowbazar Lane to Kenderdine Lane** | No | -0.50 | No | -0.25 | N/A | -0.25 | No | -0.25 |
| 5 | **Kenderdine Lane** | No | -0.50 | No | -0.25 | N/A | -0.25 | No | -0.25 |
| 6 | **Kenderdine Lane to Central Avenue** | No | -0.50 | Yes | 0.25 | Yes | 0.25 | No | -0.25 |
| 7 | **Central Avenue (GATE 4_Yogayog Bhawan)** | No | -0.50 | No | -0.25 | N/A | -0.25 | No | -0.25 |
| 8 | **Central Metro(GATE 1_Indian Airlines)** | No | -0.50 | Yes | 0.25 | Yes | 0.25 | No | -0.25 |
| 9 | **Central Avenue to Bow Street** | No | -0.50 | Yes | 0.25 | Yes | 0.25 | No | -0.25 |
| 10 | **Bow Street** | No | -0.50 | No | -0.25 | N/A | -0.25 | No | -0.25 |
| 11 | **Bow Street to Metcalfe Street** | No | -0.50 | Yes | 0.25 | Yes | 0.25 | No | -0.25 |
| 12 | **Metcalfe Street** | No | -0.50 | No | -0.25 | N/A | -0.25 | No | -0.25 |
| 13 | **Metcalfe Street to Bentinck Street** | No | -0.50 | Yes | 0.25 | Yes | 0.25 | No | -0.25 |
| 14 | **Bentinck Street** | No | -0.50 | Yes | 0.25 | Yes | 0.25 | No | -0.25 |
| 15 | **Rabindra Sarani Rd.** | Yes | 0.50 | Yes | 0.25 | Yes | 0.25 | No | -0.25 |
| 16 | **Rabindra Sarani Rd. to Chatawalla Gully** | No | -0.50 | Yes | 0.25 | Yes | 0.25 | No | -0.25 |
| 17 | **Chatawalla Gully** | No | -0.50 | No | -0.25 | N/A | -0.25 | No | -0.25 |
| 18 | **Chatawalla Gully to Phears Bye Lane** | Yes | 0.50 | No | -0.25 | N/A | -0.25 | No | -0.25 |
| 19 | **Phears Bye Lane** | No | -0.50 | No | -0.25 | N/A | -0.25 | No | -0.25 |
| 20 | **Phears Bye Lane to Phears Lane** | No | -0.50 | Yes | 0.25 | Yes | 0.25 | No | -0.25 |
| 21 | **Phears Lane** | No | -0.50 | No | -0.25 | N/A | -0.25 | No | -0.25 |
| 22 | **Phears Lane to Giri Babu lane** | No | -0.50 | No | -0.25 | N/A | -0.25 | No | -0.25 |
| 23 | **Giri Babu lane** | No | -0.50 | No | -0.25 | N/A | -0.25 | No | -0.25 |
| 24 | **Giri Babu lane to Central Avenue** | No | -0.50 | Yes | 0.25 | Yes | 0.25 | No | -0.25 |
| 25 | **Central Metro (GATE 2_Lalbazar)** | No | -0.50 | Yes | 0.25 | Yes | 0.25 | Yes | 0.25 |
| 26 | **Central Avenue (GATE 3_RITES)** | No | -0.50 | No | -0.25 | N/A | -0.25 | No | -0.25 |
| 27 | **Central Avenue to Gangadhar Babu Lane** | No | -0.50 | Yes | 0.25 | No | -0.25 | No | -0.25 |
| 28 | **Gangadhar Babu lane** | No | -0.50 | No | -0.25 | N/A | -0.25 | No | -0.25 |
| 29 | **Gangadhar Babu Lane to Bibi Rozio Lane** | No | -0.50 | No | -0.25 | N/A | -0.25 | No | -0.25 |
| 30 | **Bibi Rozio Lane** | No | -0.50 | No | -0.25 | N/A | -0.25 | No | -0.25 |
| 31 | **Bibi Rozio Lane to Bowbazar Crossing** | No | -0.50 | Yes | 0.25 | Yes | 0.25 | No | -0.25 |
| 32 | **College Street** | No | -0.50 | Yes | 0.25 | Yes | 0.25 | No | -0.25 |

[Scoring Pattern: If Yes: +0.50 for Independent Variable and +0.25 for dependent Variable; If No: -0.50 for Independent Variable; -0.25 for dependent Variable; In case of N/A: The scoring pattern is same as ‘If No’]

Variable: **Street Furniture**

| S.No | | 16 | | | |
| --- | --- | --- | --- | --- | --- |
| Criterion | | Street furniture | | | |
| Sub Criterion | | Street Furniture in the footpath | **Associated Score** | Street furniture having a knee clearance of a minimum of 700mm and wheelchair space of 1000mm **(if Street Furniture is present)** | **Associated Score** |
| Variable Type | | ***Independent*** | | ***Dependent*** | |
| Marking logic | | Beneficial if Present | | | |
| 1 | Nirmal Chandra Dey Street | No | -0.50 | N/A | -0.25 |
| 2 | Bowbazar Crossing to New Bowbazar Lane | No | -0.50 | N/A | -0.25 |
| 3 | New Bowbazar lane | Yes | 0.50 | Yes | 0.25 |
| 4 | New Bowbazar Lane to Kenderdine Lane | No | -0.50 | N/A | -0.25 |
| 5 | Kenderdine Lane | No | -0.50 | N/A | -0.25 |
| 6 | Kenderdine Lane to Central Avenue | No | -0.50 | N/A | -0.25 |
| 7 | Central Avenue (GATE 4_Yogayog Bhawan) | No | -0.50 | N/A | -0.25 |
| 8 | Central Metro(GATE 1_Indian Airlines) | No | -0.50 | N/A | -0.25 |
| 9 | Central Avenue to Bow Street | Yes | 0.50 | No | -0.25 |
| 10 | Bow Street | Yes | 0.50 | Yes | 0.25 |
| 11 | Bow Street to Metcalfe Street | Yes | 0.50 | No | -0.25 |
| 12 | Metcalfe Street | Yes | 0.50 | Yes | 0.25 |
| 13 | Metcalfe Street to Bentinck Street | No | -0.50 | N/A | -0.25 |
| 14 | Bentinck Street | No | -0.50 | N/A | -0.25 |
| 15 | Rabindra Sarani Rd. | No | -0.50 | N/A | -0.25 |
| 16 | Rabindra Sarani Rd. to Chatawalla Gully | No | -0.50 | N/A | -0.25 |
| 17 | Chatawalla Gully | Yes | 0.50 | Yes | 0.25 |
| 18 | Chatawalla Gully to Phears Bye Lane | No | -0.50 | N/A | -0.25 |
| 19 | Phears Bye Lane | Yes | 0.50 | Yes | 0.25 |
| 20 | Phears Bye Lane to Phears Lane | No | -0.50 | N/A | -0.25 |
| 21 | Phears Lane | Yes | 0.50 | Yes | 0.25 |
| 22 | Phears Lane to Giri Babu lane | No | -0.50 | N/A | -0.25 |
| 23 | Giri Babu lane | Yes | 0.50 | Yes | 0.25 |
| 24 | Giri Babu lane to Central Avenue | No | -0.50 | N/A | -0.25 |
| 25 | Central Metro (GATE 2_Lalbazar) | No | -0.50 | N/A | -0.25 |
| 26 | Central Avenue (GATE 3_RITES) | No | -0.50 | N/A | -0.25 |
| 27 | Central Avenue to Gangadhar Babu Lane | No | -0.50 | N/A | -0.25 |
| 28 | Gangadhar Babu lane | Yes | 0.50 | Yes | 0.25 |
| 29 | Gangadhar Babu Lane to Bibi Rozio Lane | No | -0.50 | N/A | -0.25 |
| 30 | Bibi Rozio Lane | No | -0.50 | N/A | -0.25 |
| 31 | Bibi Rozio Lane to Bowbazar Crossing | Yes | 0.50 | No | -0.25 |
| 32 | College Street | No | -0.50 | N/A | -0.25 |

[Scoring Pattern: If Yes: +0.50 for Independent Variable and +0.25 for dependent Variable; If No: -0.50 for Independent Variable; -0.25 for dependent Variable; In case of N/A: The scoring pattern is same as ‘If No’]

Variable: **Safety and Security**

| S.No | | 17 | | | | |
| --- | --- | --- | --- | --- | --- | --- |
| Criterion | | Safety and Security | | | | |
| Sub Criterion | | Fire Hydrant | **Associated Score** | Security Camera | **Associated Score** | | |
| Variable Type | | ***Independent*** | | | | |
| Marking logic | | Beneficial if Present | | | | |
| 1 | Nirmal Chandra Dey Street | No | -0.50 | No | | -0.50 | | |
| 2 | Bowbazar Crossing to New Bowbazar Lane | No | -0.50 | No | | -0.50 | | |
| 3 | New Bowbazar lane | No | -0.50 | No | | -0.50 | | |
| 4 | New Bowbazar Lane to Kenderdine Lane | No | -0.50 | No | | -0.50 | | |
| 5 | Kenderdine Lane | No | -0.50 | No | | -0.50 | | |
| 6 | Kenderdine Lane to Central Avenue | No | -0.50 | No | | -0.50 | | |
| 7 | Central Avenue (GATE 4_Yogayog Bhawan) | No | -0.50 | No | | -0.50 | | |
| 8 | Central Metro(GATE 1_Indian Airlines) | No | -0.50 | No | | -0.50 | | |
| 9 | Central Avenue to Bow Street | No | -0.50 | No | | -0.50 | | |
| 10 | Bow Street | No | -0.50 | No | | -0.50 | | |
| 11 | Bow Street to Metcalfe Street | No | -0.50 | No | | -0.50 | | |
| 12 | Metcalfe Street | No | -0.50 | No | | -0.50 | | |
| 13 | Metcalfe Street to Bentinck Street | No | -0.50 | No | | -0.50 | | |
| 14 | Bentinck Street | No | -0.50 | No | | -0.50 | | |
| 15 | Rabindra Sarani Rd. | No | -0.50 | No | | -0.50 | | |
| 16 | Rabindra Sarani Rd. to Chatawalla Gully | No | -0.50 | No | | -0.50 | | |
| 17 | Chatawalla Gully | No | -0.50 | No | | -0.50 | | |
| 18 | Chatawalla Gully to Phears Bye Lane | No | -0.50 | No | | -0.50 | | |
| 19 | Phears Bye Lane | No | -0.50 | No | | -0.50 | | |
| 20 | Phears Bye Lane to Phears Lane | No | -0.50 | No | | -0.50 | | |
| 21 | Phears Lane | No | -0.50 | No | | -0.50 | | |
| 22 | Phears Lane to Giri Babu lane | No | -0.50 | No | | -0.50 | | |
| 23 | Giri Babu lane | No | -0.50 | No | | -0.50 | | |
| 24 | Giri Babu lane to Central Avenue | No | -0.50 | No | | -0.50 | | |
| 25 | Central Metro (GATE 2_Lalbazar) | No | -0.50 | No | | -0.50 | | |
| 26 | Central Avenue (GATE 3_RITES) | No | -0.50 | No | | -0.50 | | |
| 27 | Central Avenue to Gangadhar Babu Lane | No | -0.50 | No | | -0.50 | | |
| 28 | Gangadhar Babu lane | No | -0.50 | No | | -0.50 | | |
| 29 | Gangadhar Babu Lane to Bibi Rozio Lane | No | -0.50 | No | | -0.50 | | |
| 30 | Bibi Rozio Lane | No | -0.50 | No | | -0.50 | | |
| 31 | Bibi Rozio Lane to Bowbazar Crossing | No | -0.50 | No | | -0.50 | | |
| 32 | College Street | No | -0.50 | No | | -0.50 | | |

[Scoring Pattern: If Yes: +0.50 for Independent Variable and +0.25 for dependent Variable; If No: -0.50 for Independent Variable; -0.25 for dependent Variable]

Variable: **Additional Inclusive features**

| S.No | | 18 | | | | | | | |
| --- | --- | --- | --- | --- | --- | --- | --- | --- | --- |
| Criterion | | Additional Inclusive features | | | | | | | |
| Sub Criterion | | Signage | **Associated Score** | Bicycle Track | **Associated Score** | Public Drinking Water Facility | **Associated Score** | Street Art | **Associated Score** |
| Variable Type | | ***Independent*** | | | | | | | |
| Marking logic | | Beneficial if Present | | | | | | | |
| 1 | Nirmal Chandra Dey Street | No | -0.50 | No | -0.50 | No | -0.50 | No | -0.50 |
| 2 | Bowbazar Crossing to New Bowbazar Lane | No | -0.50 | No | -0.50 | No | -0.50 | No | -0.50 |
| 3 | New Bowbazar lane | No | -0.50 | No | -0.50 | No | -0.50 | No | -0.50 |
| 4 | New Bowbazar Lane to Kenderdine Lane | No | -0.50 | No | -0.50 | No | -0.50 | No | -0.50 |
| 5 | Kenderdine Lane | No | -0.50 | No | -0.50 | No | -0.50 | No | -0.50 |
| 6 | Kenderdine Lane to Central Avenue | No | -0.50 | No | -0.50 | No | -0.50 | No | -0.50 |
| 7 | Central Avenue (GATE 4_Yogayog Bhawan) | No | -0.50 | No | -0.50 | No | -0.50 | Yes | 0.50 |
| 8 | Central Metro(GATE 1_Indian Airlines) | No | -0.50 | No | -0.50 | No | -0.50 | No | -0.50 |
| 9 | Central Avenue to Bow Street | No | -0.50 | No | -0.50 | No | -0.50 | No | -0.50 |
| 10 | Bow Street | No | -0.50 | No | -0.50 | No | -0.50 | No | -0.50 |
| 11 | Bow Street to Metcalfe Street | No | -0.50 | No | -0.50 | No | -0.50 | No | -0.50 |
| 12 | Metcalfe Street | No | -0.50 | No | -0.50 | No | -0.50 | No | -0.50 |
| 13 | Metcalfe Street to Bentinck Street | No | -0.50 | No | -0.50 | No | -0.50 | No | -0.50 |
| 14 | Bentinck Street | No | -0.50 | No | -0.50 | No | -0.50 | No | -0.50 |
| 15 | Rabindra Sarani Rd. | No | -0.50 | No | -0.50 | No | -0.50 | No | -0.50 |
| 16 | Rabindra Sarani Rd. to Chatawalla Gully | No | -0.50 | No | -0.50 | No | -0.50 | No | -0.50 |
| 17 | Chatawalla Gully | No | -0.50 | No | -0.50 | No | -0.50 | No | -0.50 |
| 18 | Chatawalla Gully to Phears Bye Lane | No | -0.50 | No | -0.50 | No | -0.50 | No | -0.50 |
| 19 | Phears Bye Lane | No | -0.50 | No | -0.50 | No | -0.50 | No | -0.50 |
| 20 | Phears Bye Lane to Phears Lane | No | -0.50 | No | -0.50 | No | -0.50 | No | -0.50 |
| 21 | Phears Lane | No | -0.50 | No | -0.50 | No | -0.50 | No | -0.50 |
| 22 | Phears Lane to Giri Babu lane | No | -0.50 | No | -0.50 | No | -0.50 | No | -0.50 |
| 23 | Giri Babu lane | No | -0.50 | No | -0.50 | No | -0.50 | No | -0.50 |
| 24 | Giri Babu lane to Central Avenue | No | -0.50 | No | -0.50 | No | -0.50 | No | -0.50 |
| 25 | Central Metro (GATE 2_Lalbazar) | No | -0.50 | No | -0.50 | No | -0.50 | No | -0.50 |
| 26 | Central Avenue (GATE 3_RITES) | No | -0.50 | No | -0.50 | No | -0.50 | No | -0.50 |
| 27 | Central Avenue to Gangadhar Babu Lane | No | -0.50 | No | -0.50 | No | -0.50 | No | -0.50 |
| 28 | Gangadhar Babu lane | No | -0.50 | No | -0.50 | No | -0.50 | No | -0.50 |
| 29 | Gangadhar Babu Lane to Bibi Rozio Lane | No | -0.50 | No | -0.50 | No | -0.50 | No | -0.50 |
| 30 | Bibi Rozio Lane | No | -0.50 | No | -0.50 | No | -0.50 | No | -0.50 |
| 31 | Bibi Rozio Lane to Bowbazar Crossing | No | -0.50 | No | -0.50 | No | -0.50 | No | -0.50 |
| 32 | College Street | No | -0.50 | No | -0.50 | No | -0.50 | No | -0.50 |

[Scoring Pattern: If Yes: +0.50 for Independent Variable and +0.25 for dependent Variable; If No: -0.50 for Independent Variable; -0.25 for dependent Variable]
